# Supplementary material for: Clinical Practice Guideline for Endoscopic Resection of Early Gastrointestinal Cancer
Source: PubMed Central journal article supplement — Clin Endosc. 2020 Mar 30;53(2):142–66. doi: 10.5946/ce.2020.032 (PMC7137564; doi:10.5946/ce.2020.032), 2020-03-30

## SUPPLEMENTARY MATERIAL II. SEARCH FLOW CHARTS

### 1. Superficial esophageal squamous cell carcinoma

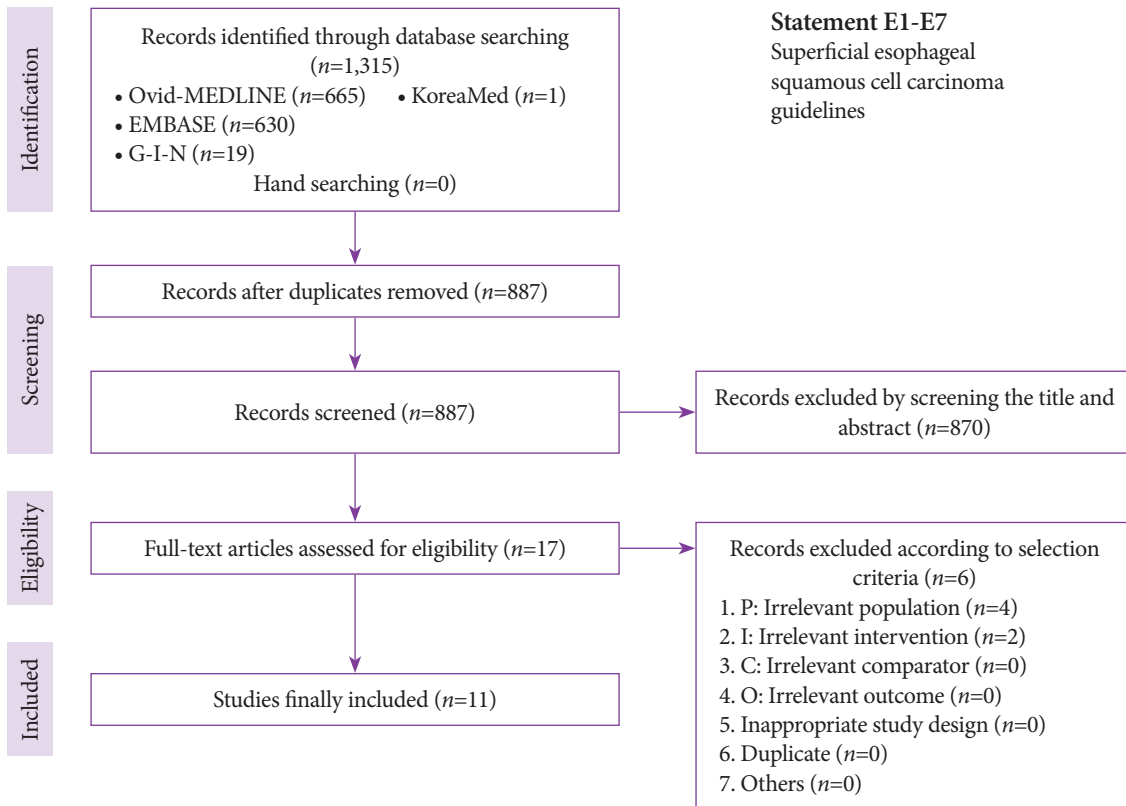

## 2. Early gastric cancer

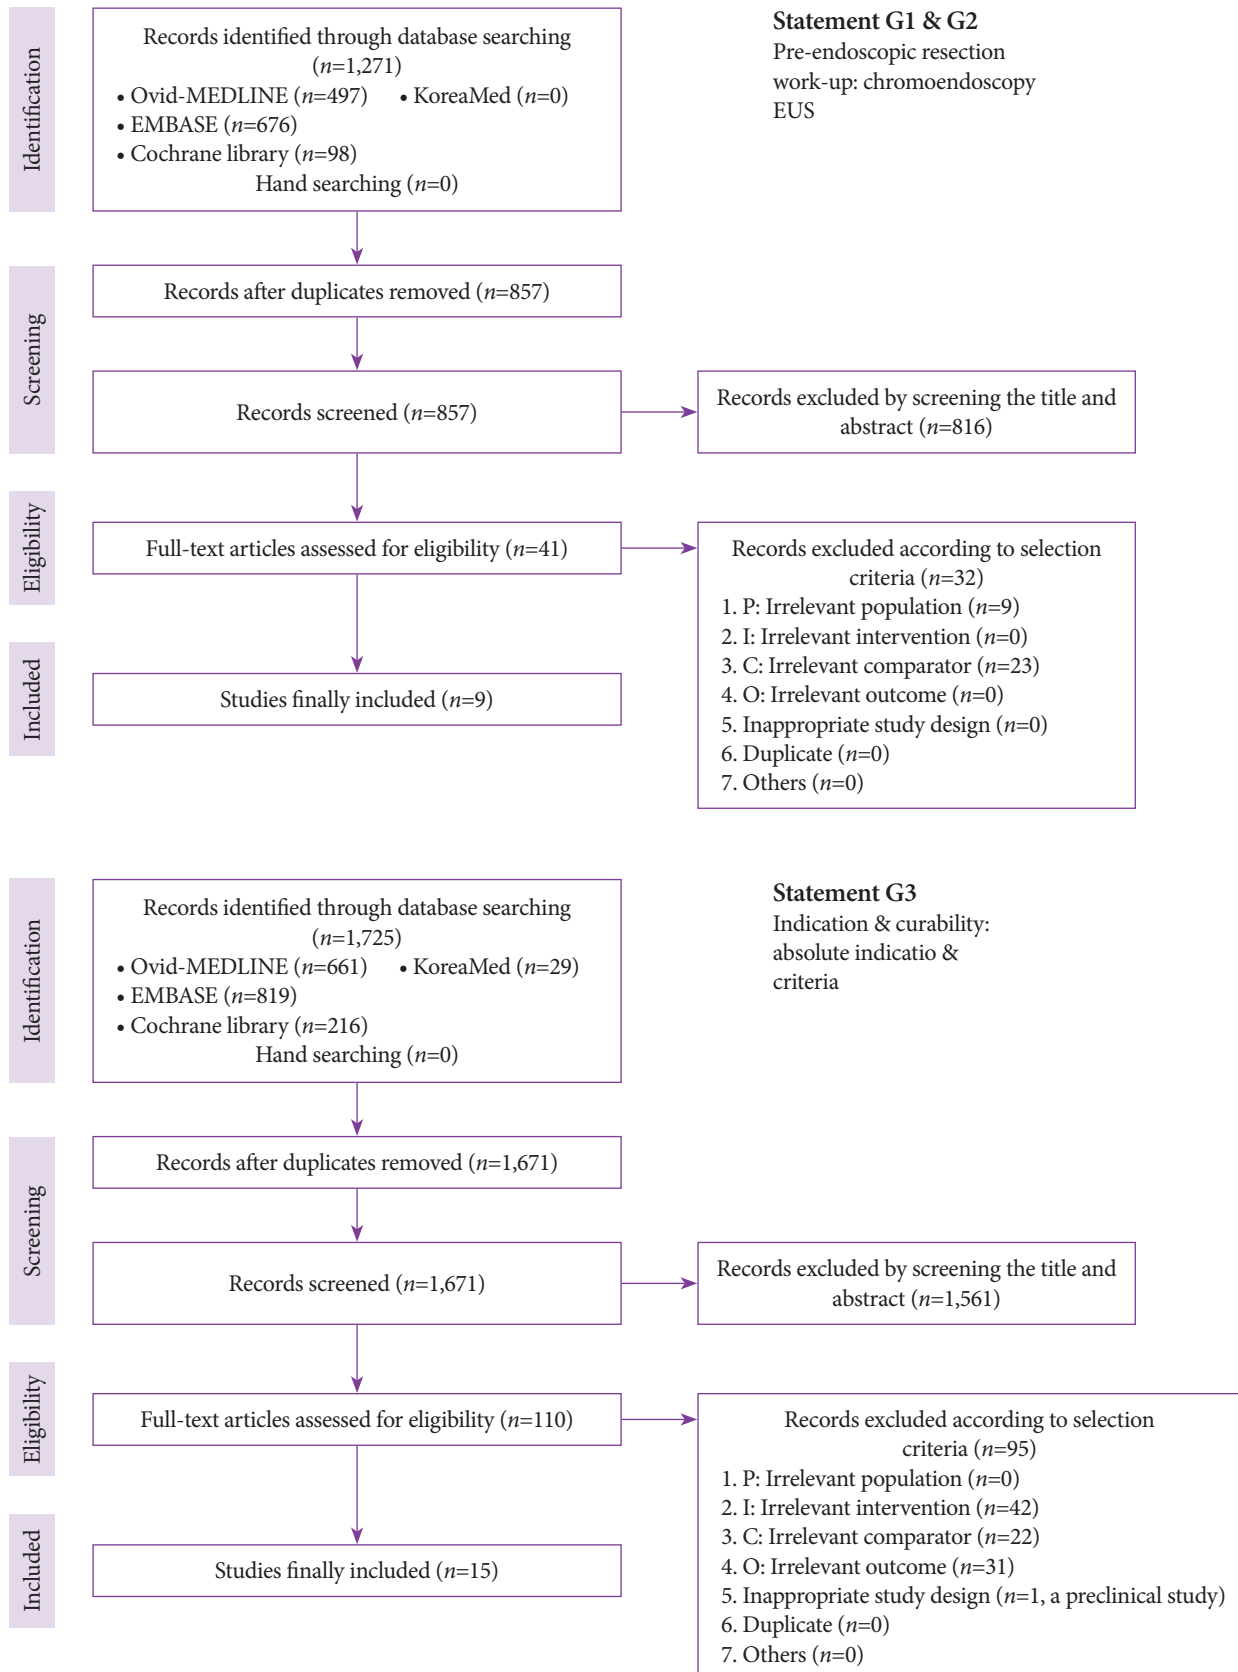

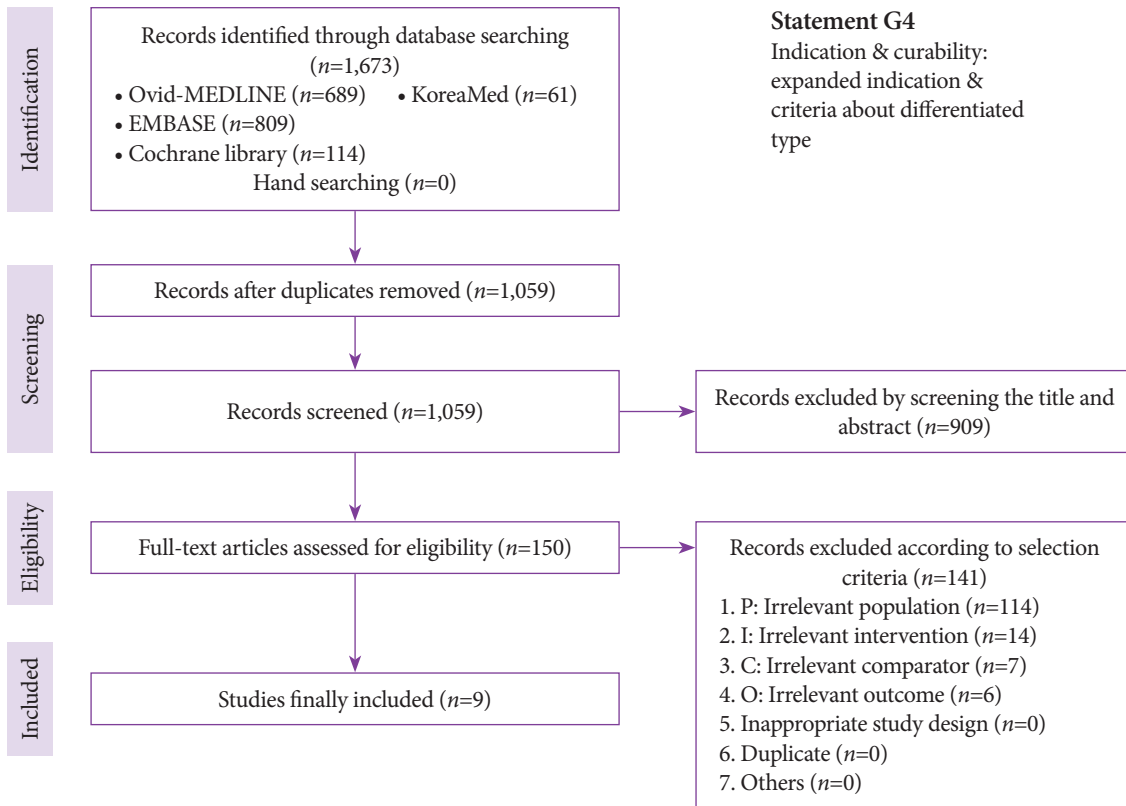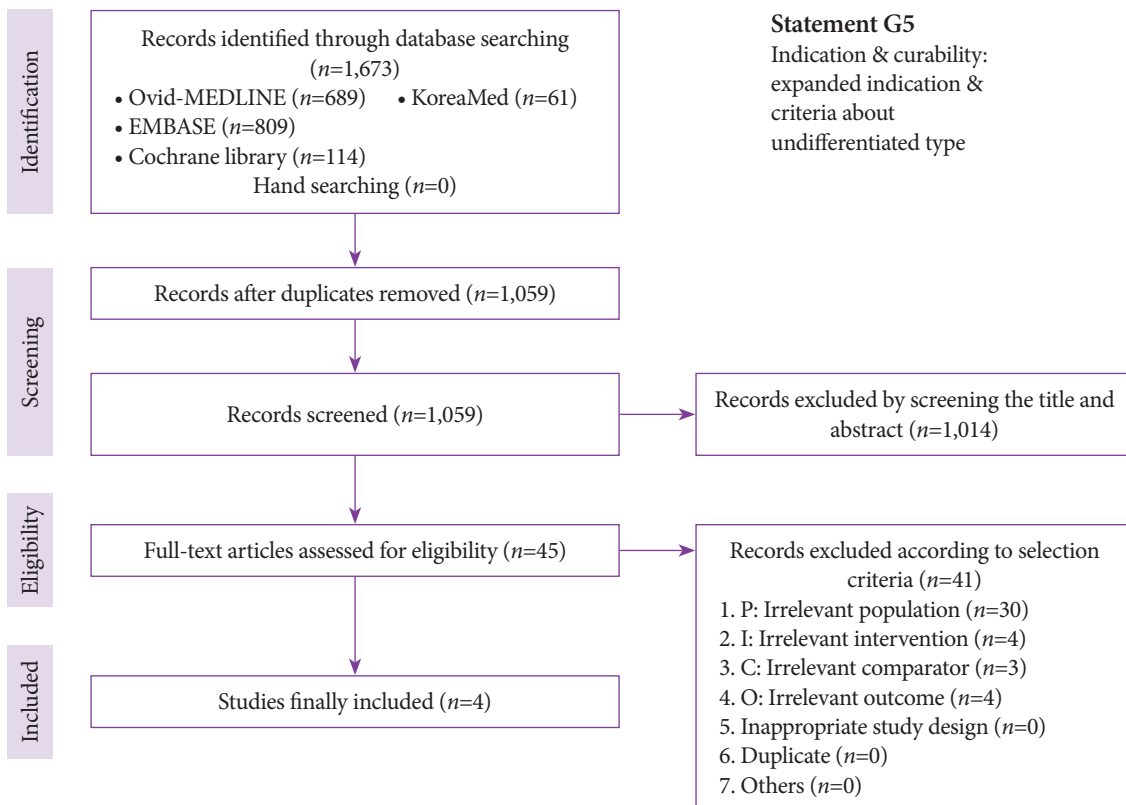

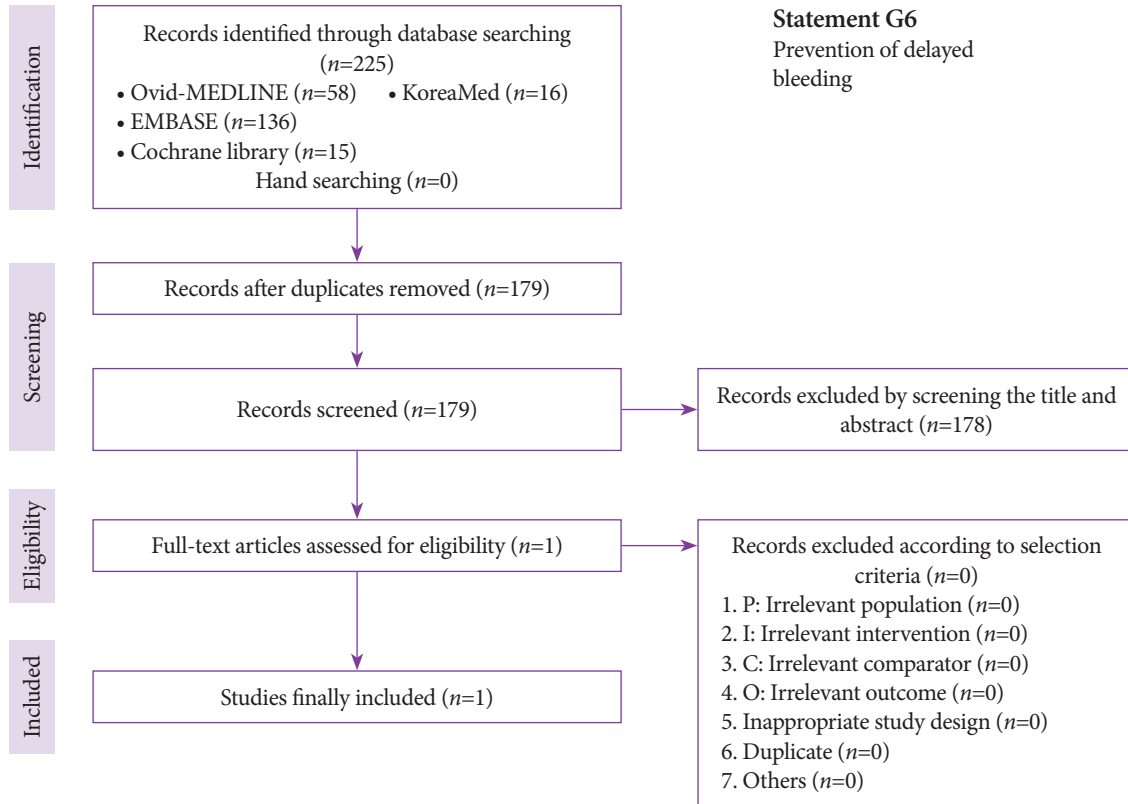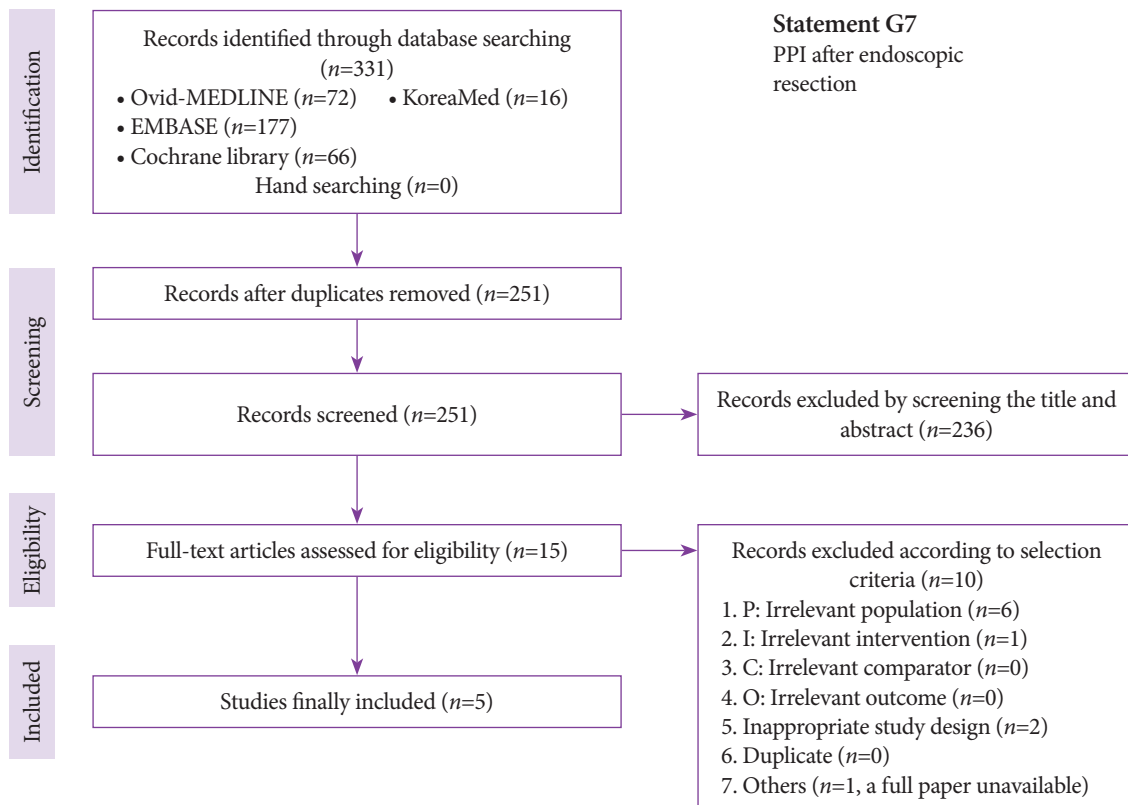

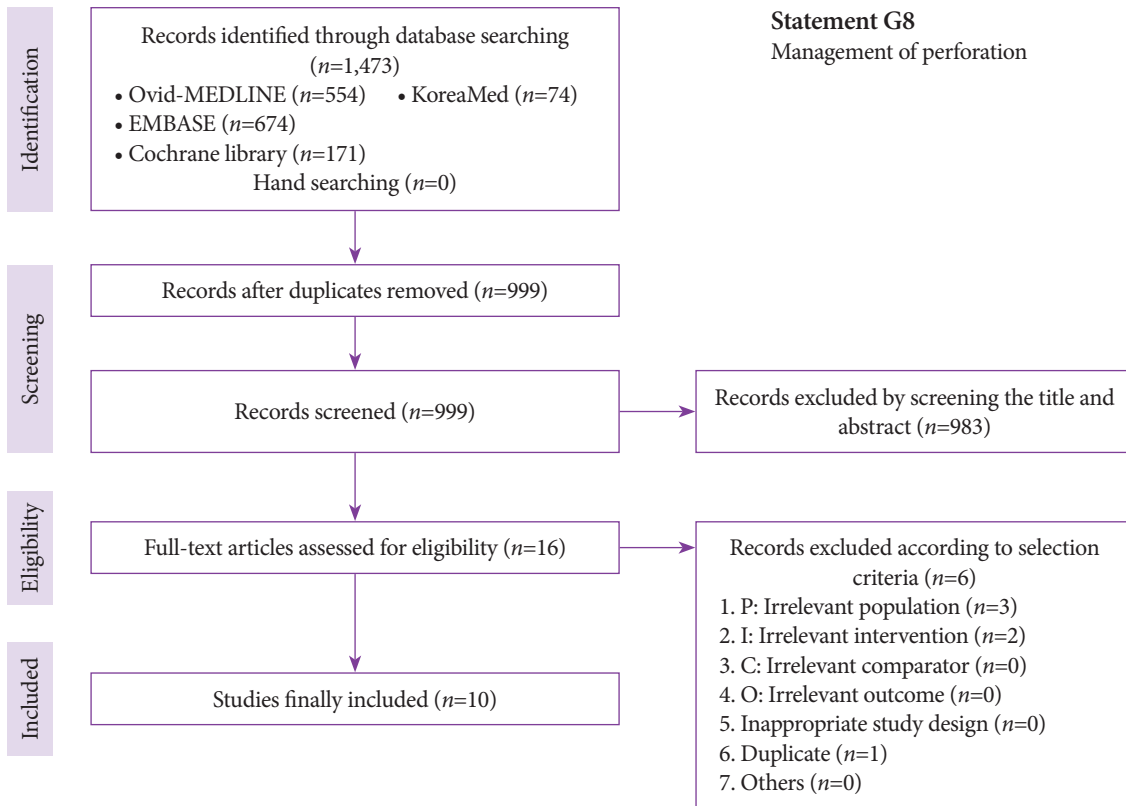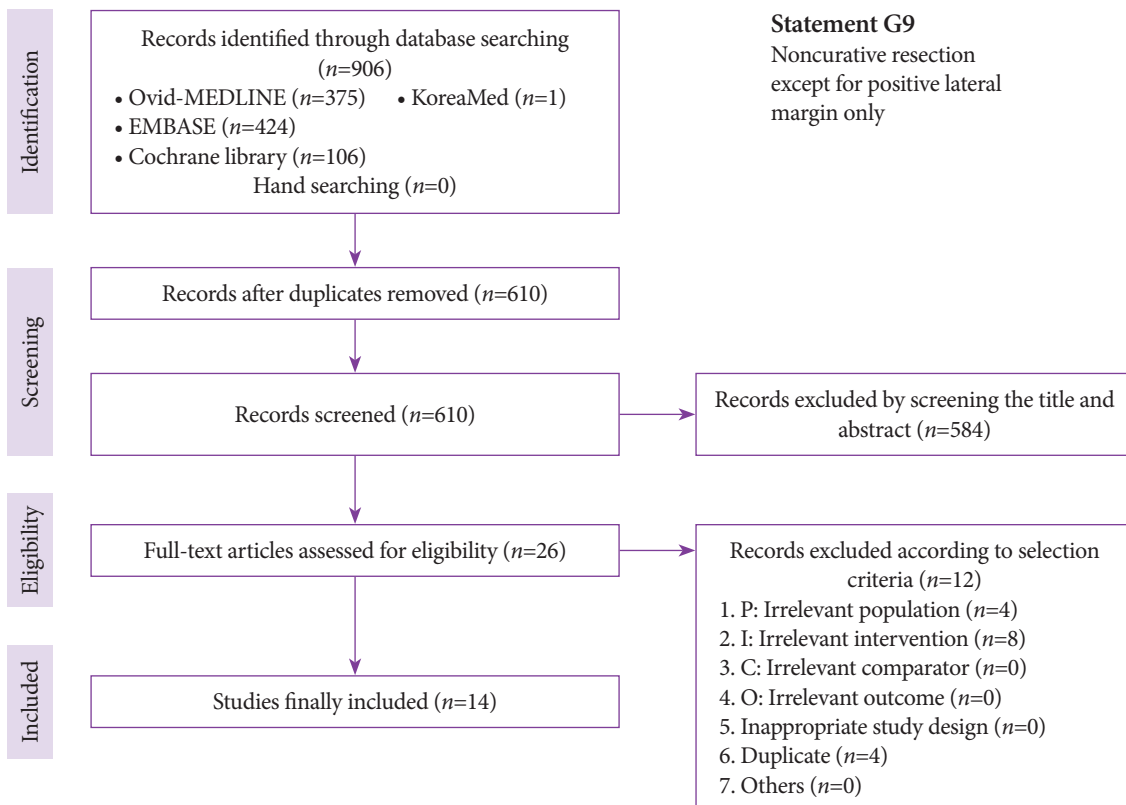

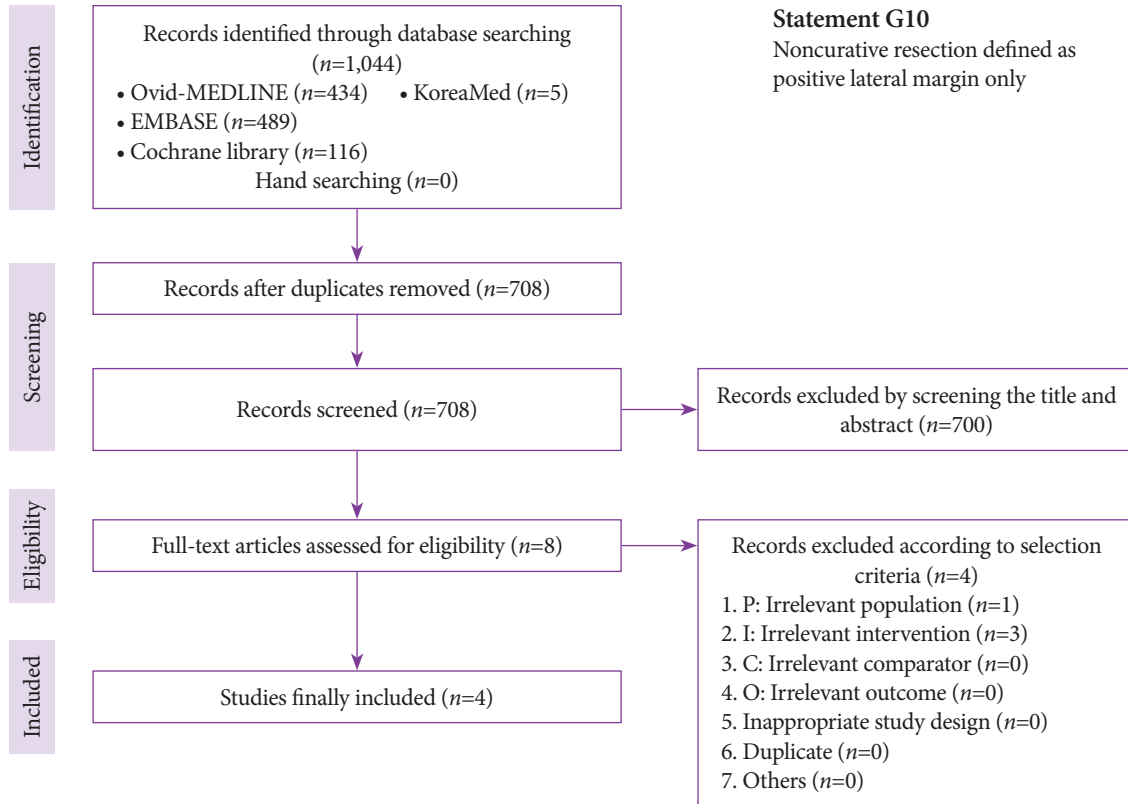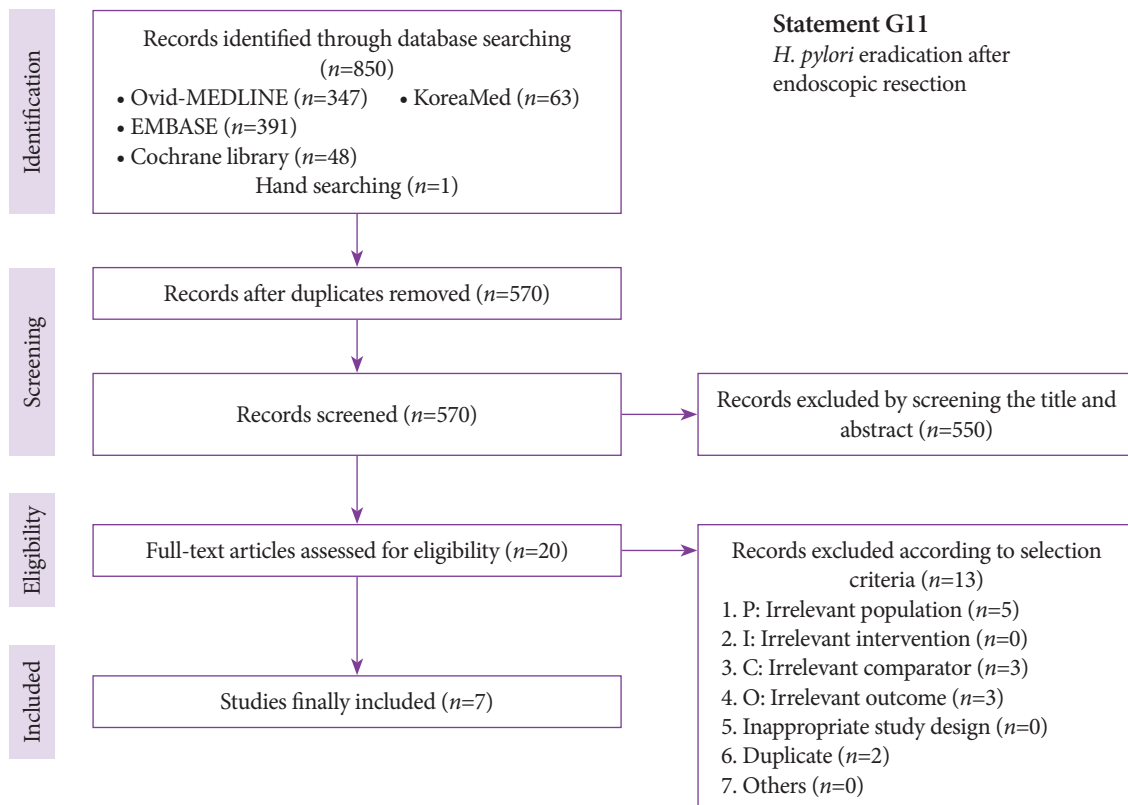

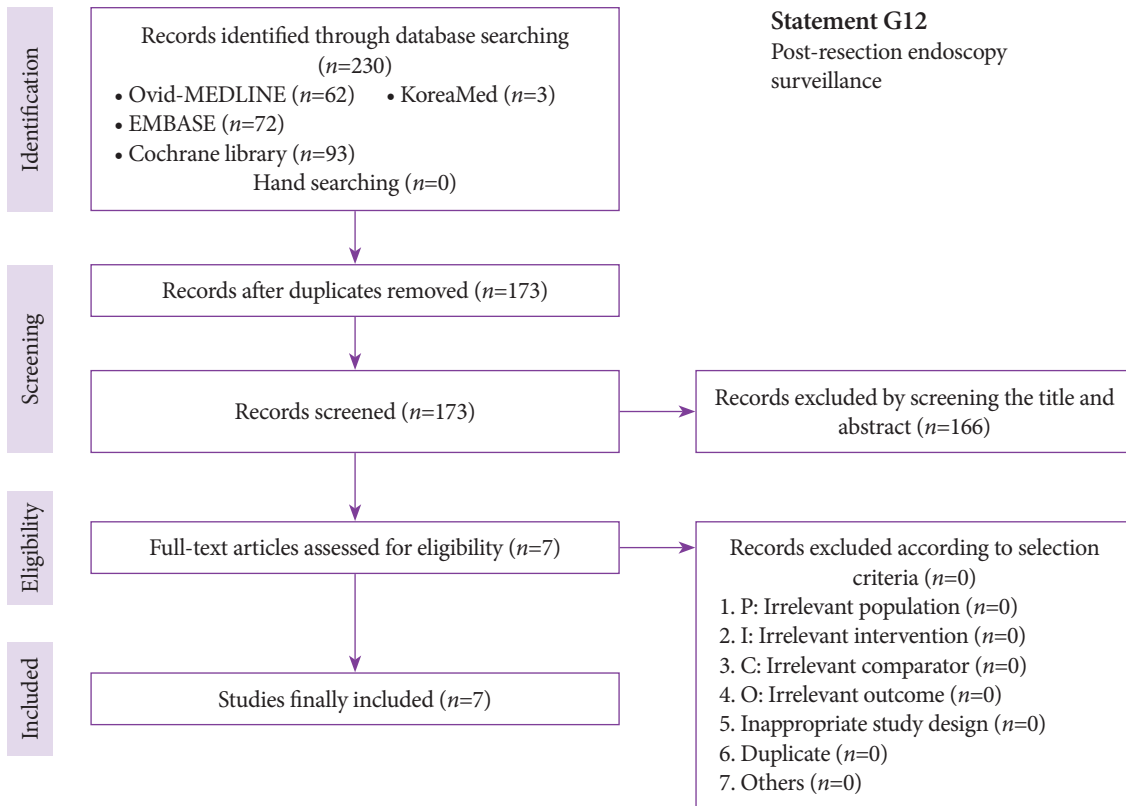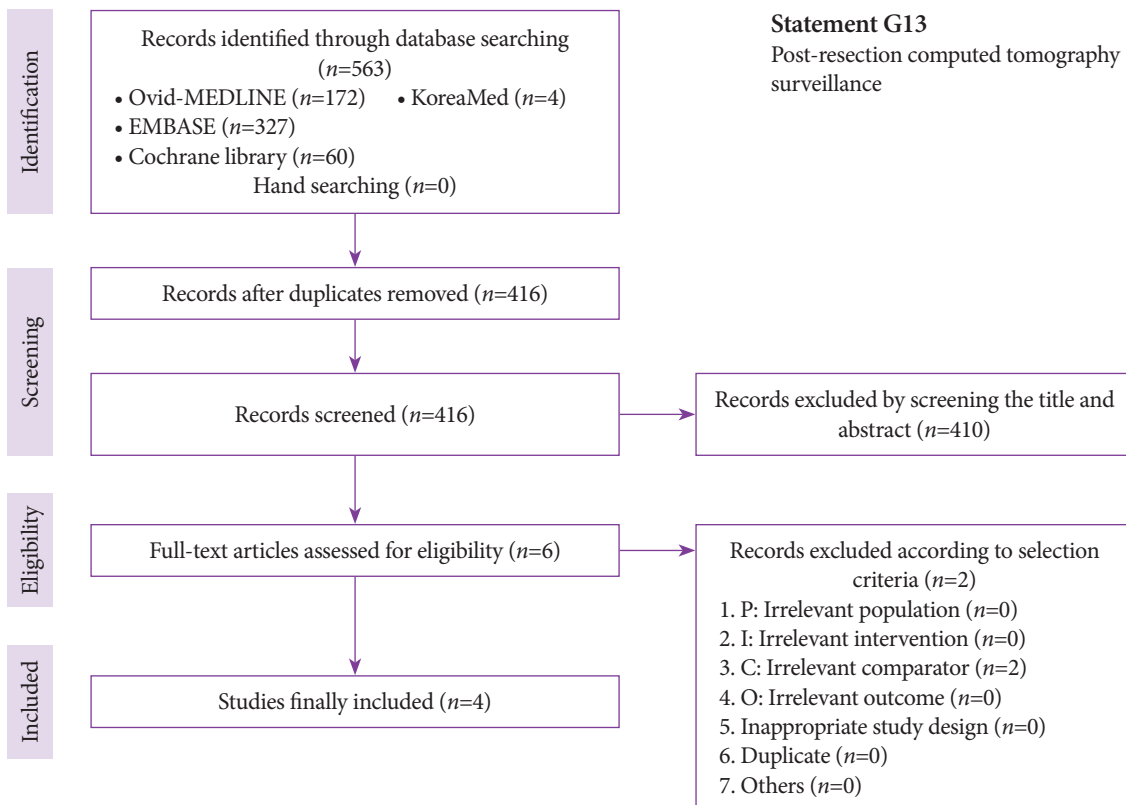

### 3. Early colorectal cancer

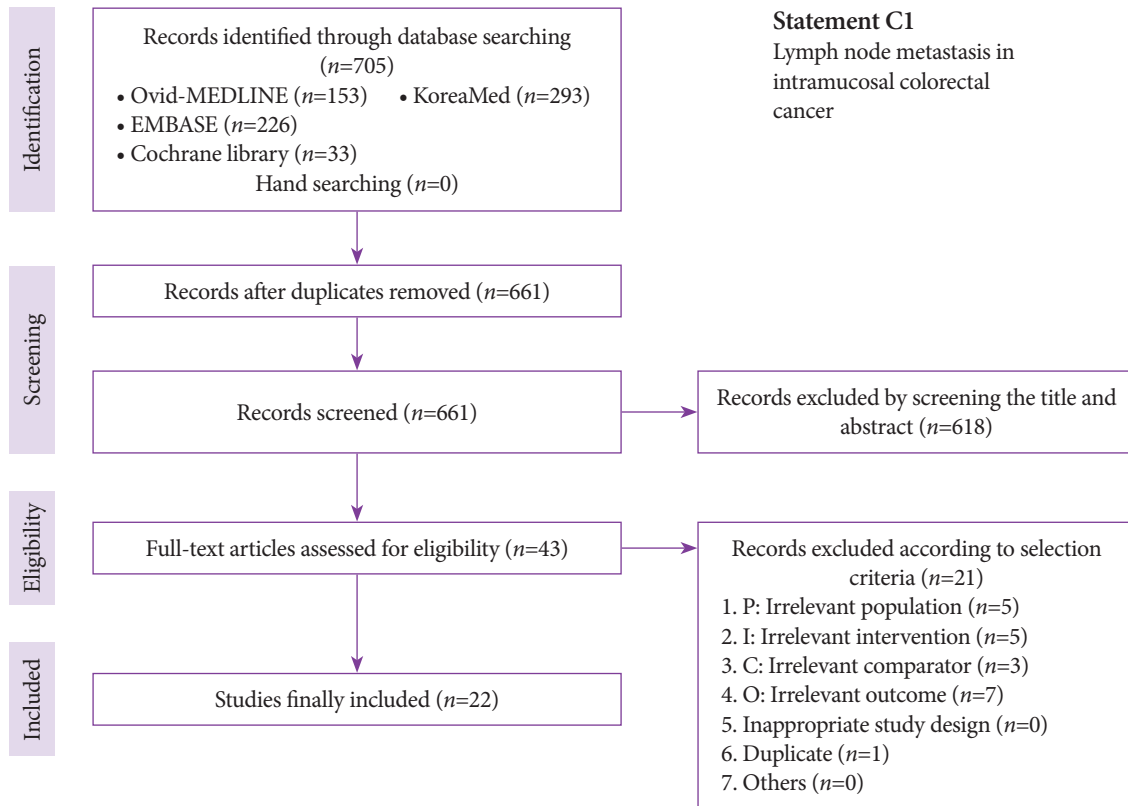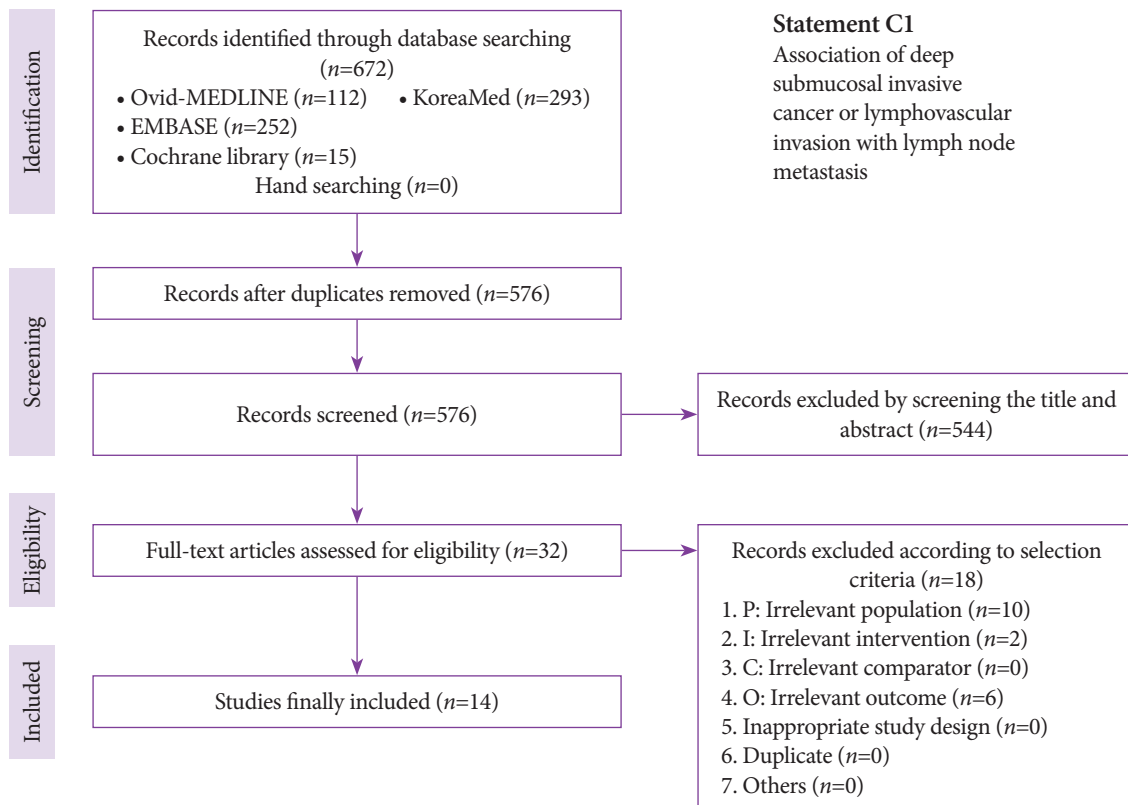



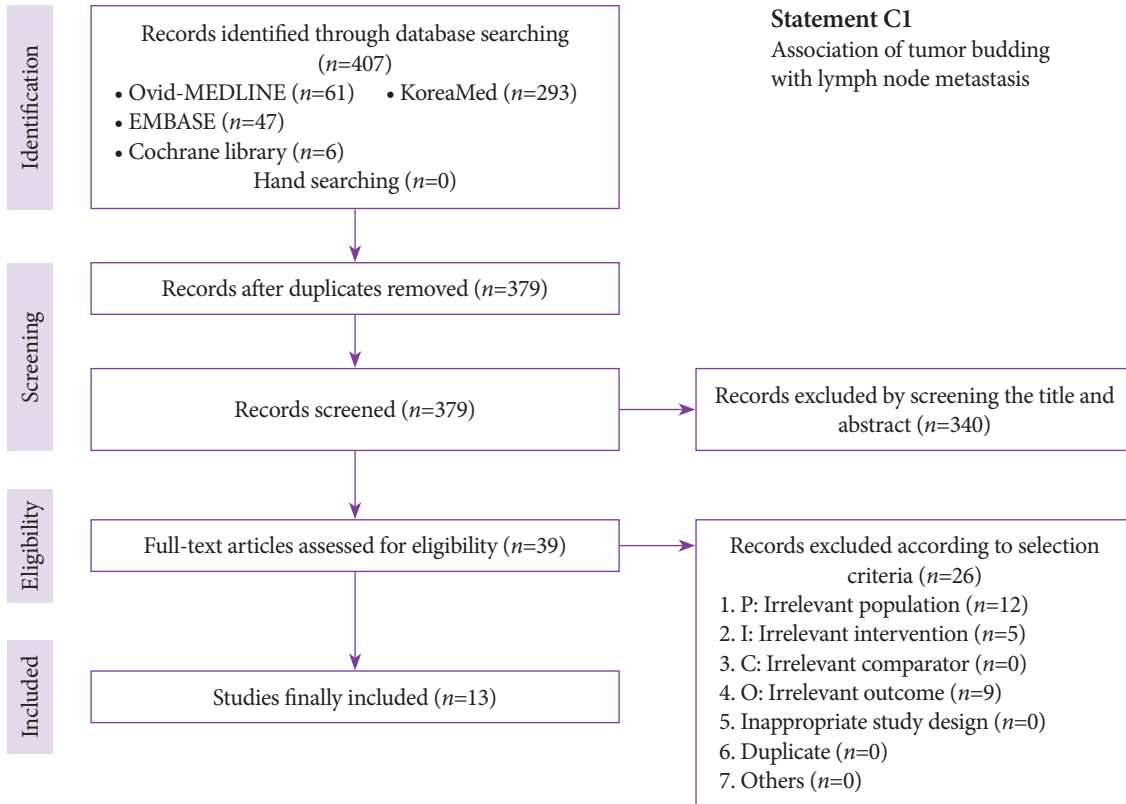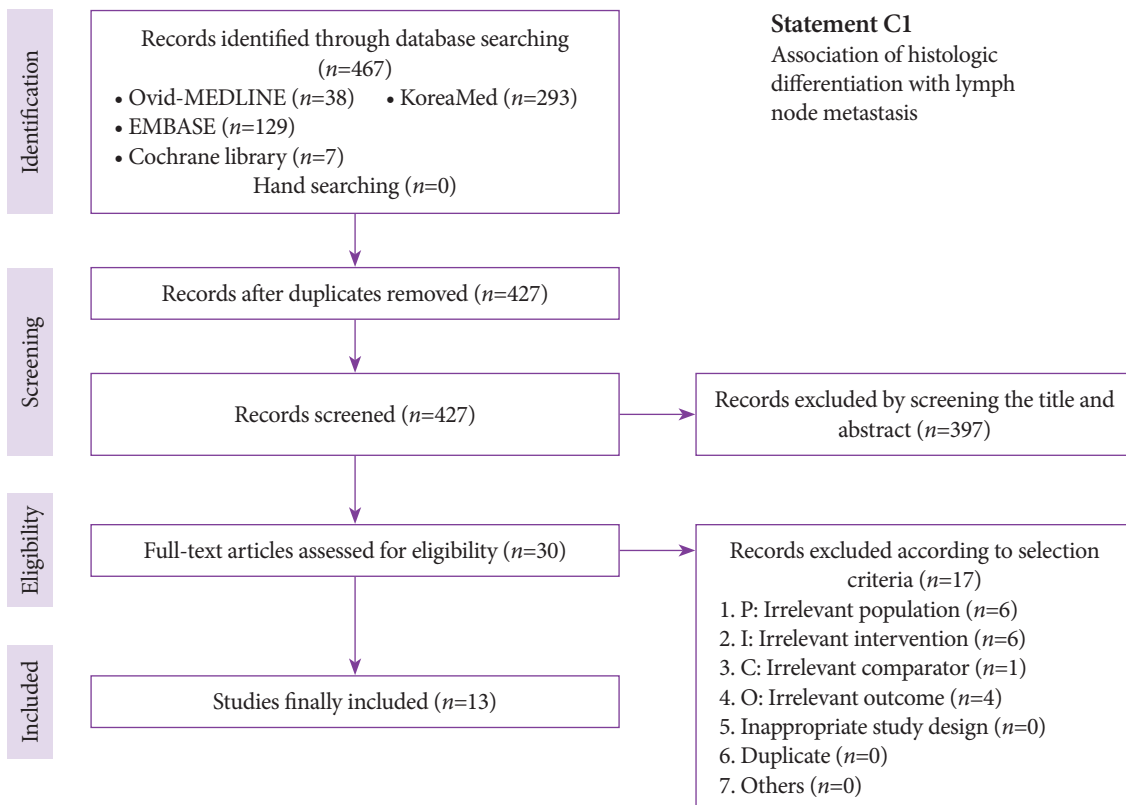

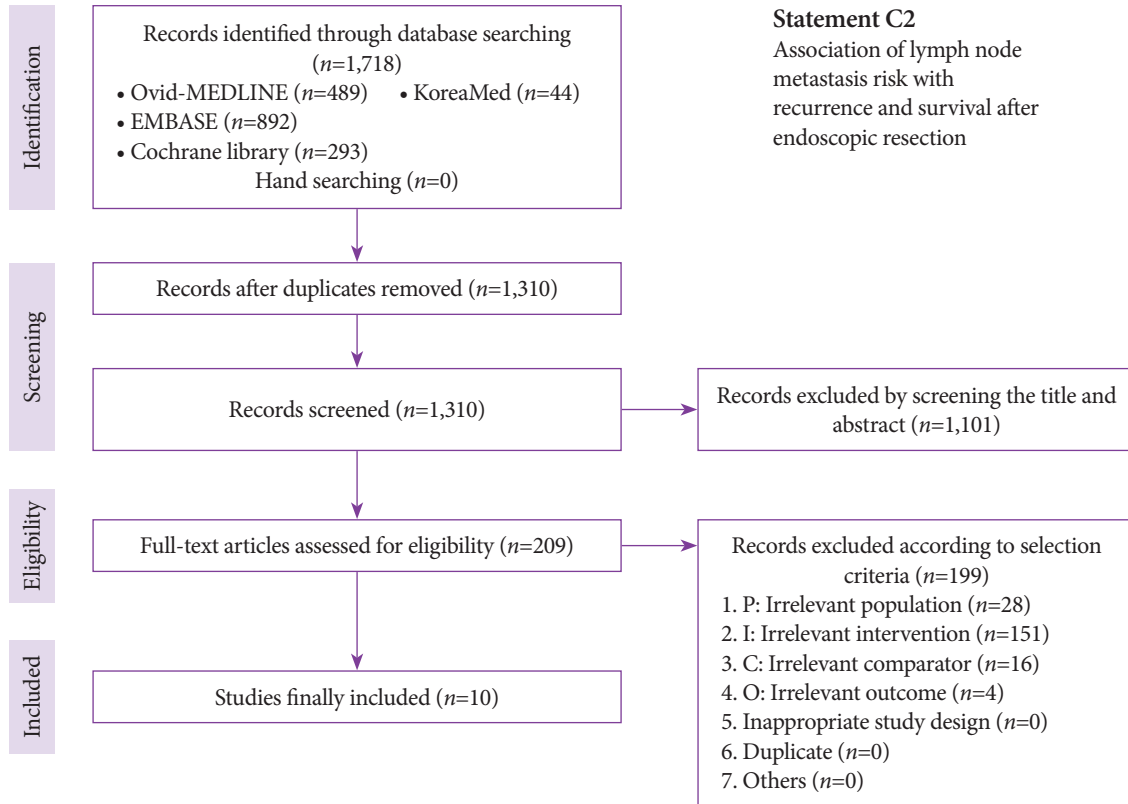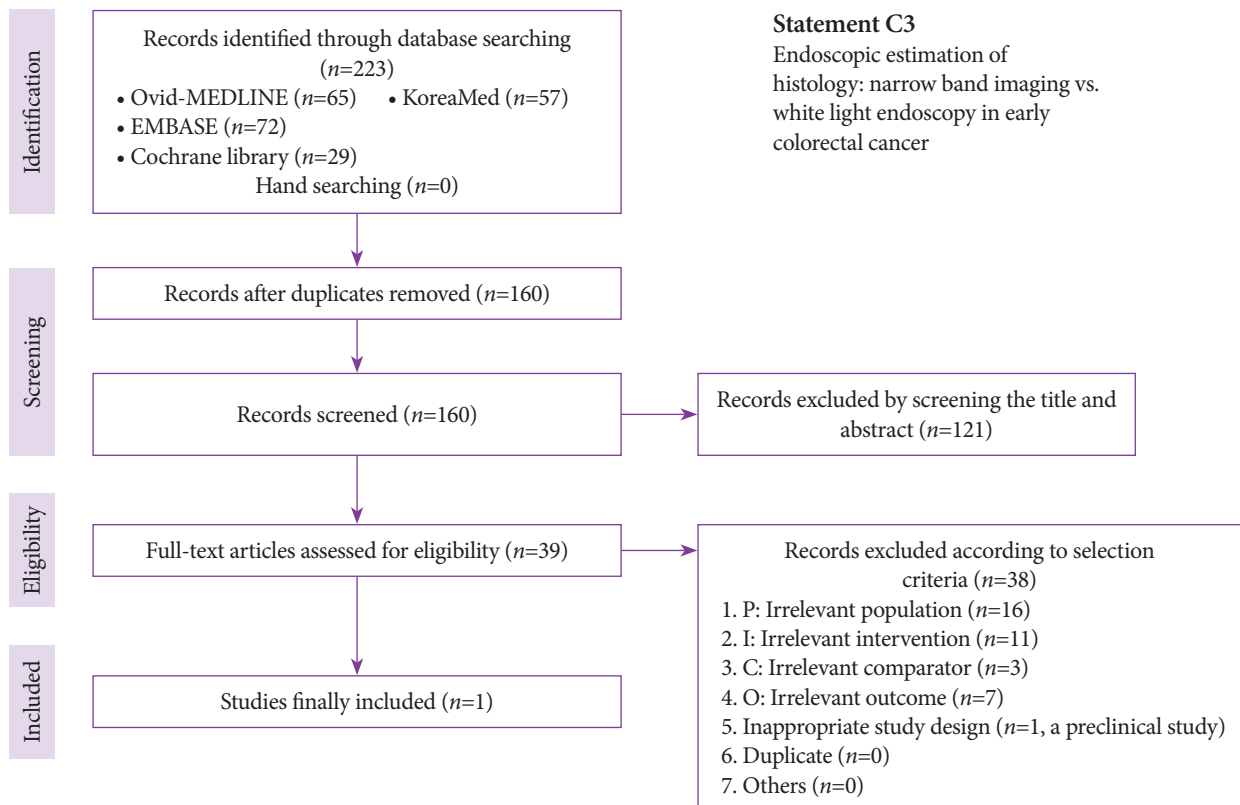

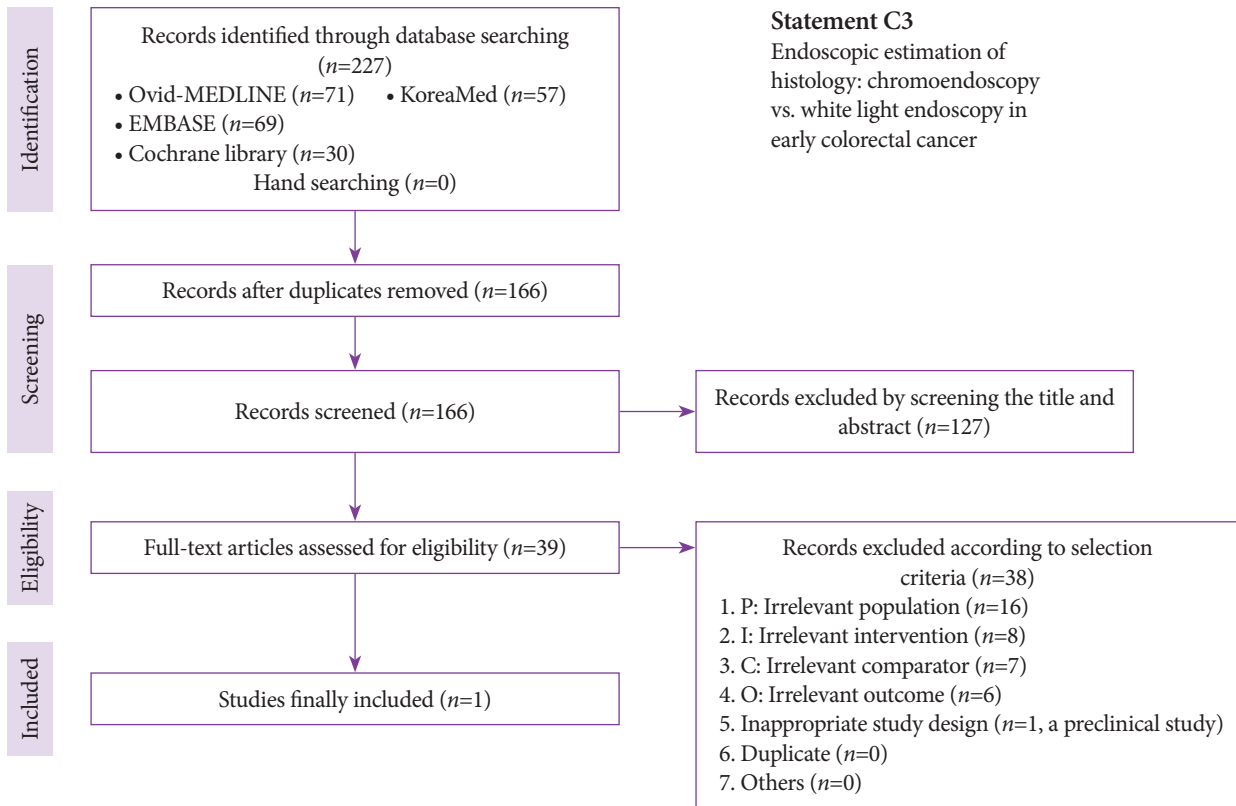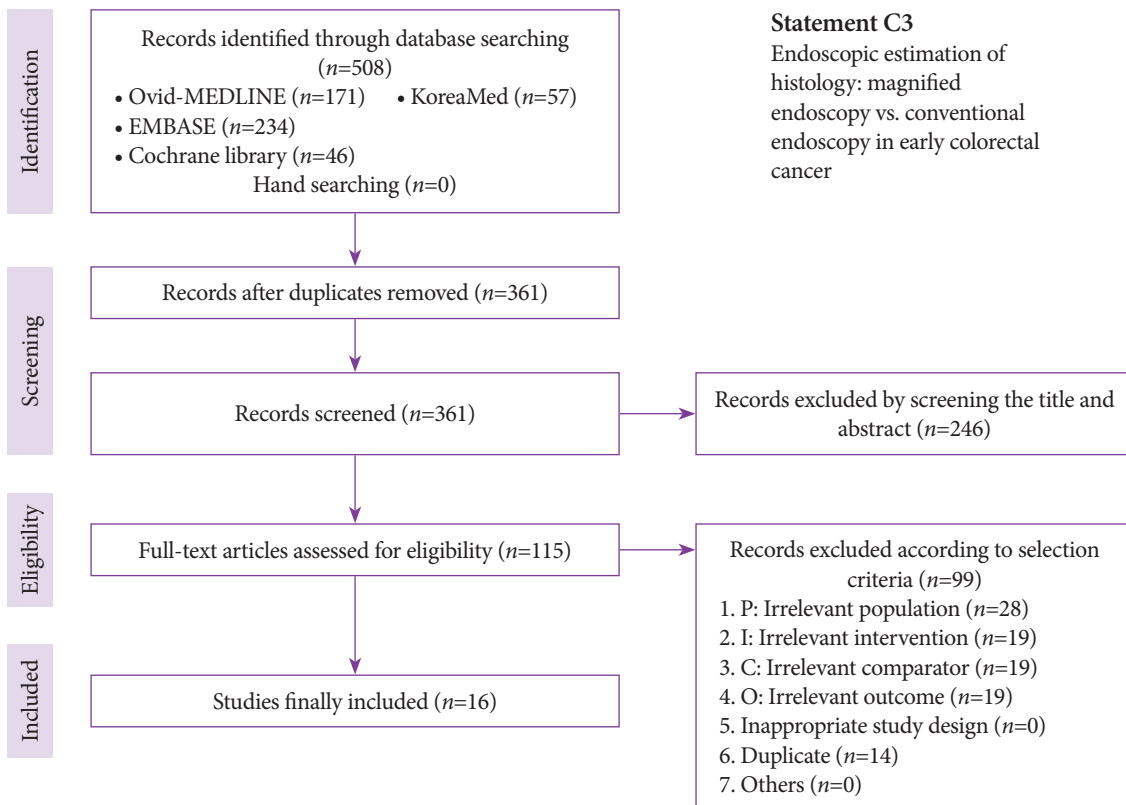

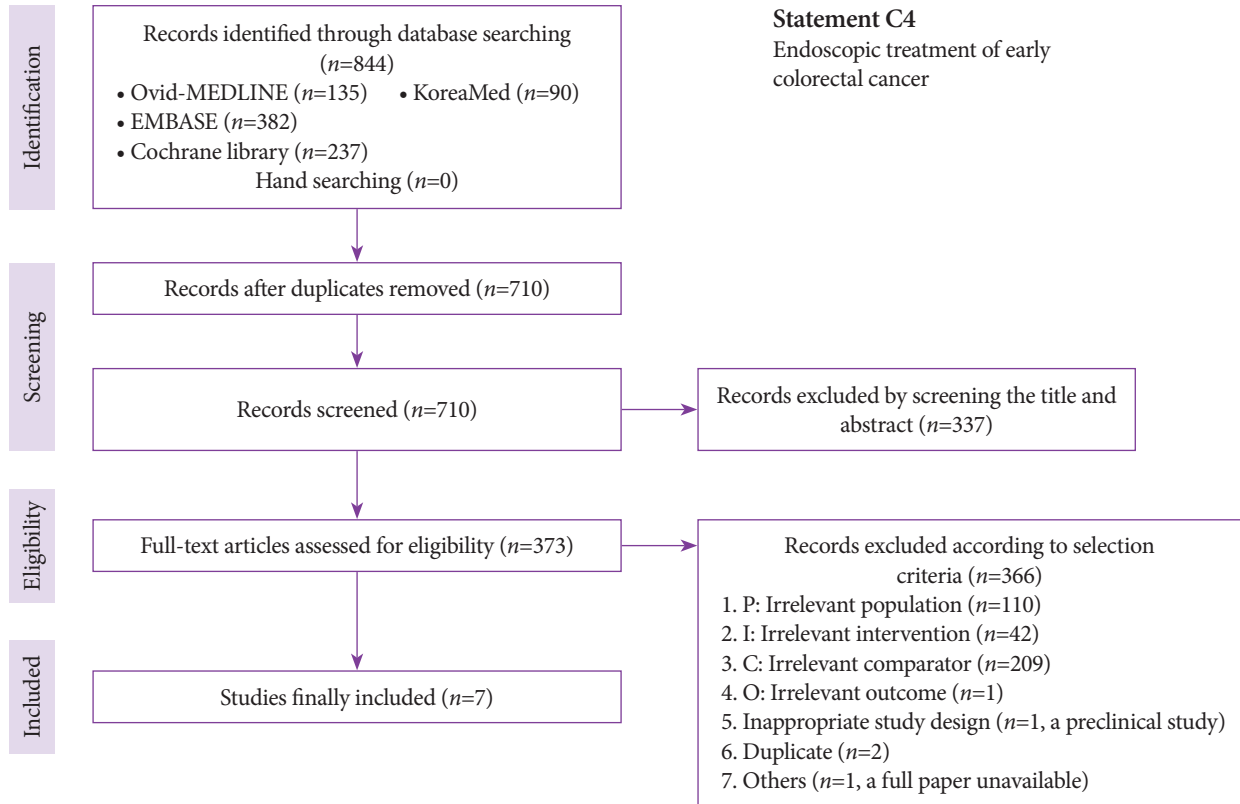

Supplement: ce-2020-032-suppl2.pdf [file ce-2020-032-suppl2.pdf]
