# Supplementary material for: Clinical Practice Guideline for Endoscopic Resection of Early Gastrointestinal Cancer
Source: PubMed Central journal article supplement — Clin Endosc. 2020 Mar 30;53(2):142–66. doi: 10.5946/ce.2020.032 (PMC7137564; doi:10.5946/ce.2020.032), 2020-03-30
Supplement: ce-2020-032-suppl1.pdf [file ce-2020-032-suppl1.pdf]

## SUPPLEMENTARY MATERIAL 1. PICOS FOR EACH STATEMENT

### 1. Description of PICOs for superficial esophageal squamous cell carcinoma

**Statement E1: We recommend endoscopic resection for superficial esophageal squamous cell carcinoma (SESCC) without distant or lymph node metastasis, excluding those with obvious submucosal invasion (Grade of recommendation: strong, Level of evidence: moderate).**

**Q1.** What are the indications for endoscopic resection of superficial esophageal squamous cell carcinoma?

**Patient:** Patients who undergo either endoscopic resection or esophagectomy for superficial esophageal squamous cell carcinoma without lymph node metastasis  
**Intervention:** Endoscopic resection  
**Comparator:** Esophagectomy  
**Outcome:** Survival rate  
**Study design:** Randomized controlled trial (RCT) or non-RCT

**Statement E2: We recommend Lugol chromoendoscopy and/or image-enhanced endoscopy to define the extent of lesion before endoscopic treatment of SESCO (Grade of recommendation: strong, Level of evidence: moderate).**

**Q1.** Does chromoendoscopy or image-enhanced endoscopy before endoscopic resection of superficial esophageal squamous cell carcinoma help the evaluation of the lateral margin of the lesion?

**Patient:** Patients who were diagnosed with superficial esophageal squamous cell carcinoma  
**Intervention:** Chromoendoscopy, image-enhanced endoscopy  
**Comparator:** No chromoendoscopy or image-enhanced endoscopy after diagnosis of superficial esophageal squamous cell carcinoma  
**Outcome:** Lateral margin  
**Study design:** RCT or non-RCT

**Statement E3: We recommend endoscopic ultrasound to define the stage of SESCO before endoscopic treatment (Grade of recommendation: strong, Level of evidence: moderate).**

**Q1.** Does endoscopic ultrasound (EUS) before endoscopic resection of superficial esophageal squamous cell carcinoma help to stage the disease?

**Patient:** Patients who were diagnosed with superficial esophageal squamous cell carcinoma  
**Intervention:** EUS  
**Comparator:** No EUS after diagnosis of superficial esophageal squamous cell carcinoma  
**Outcome:** Depth of invasion, lymph node metastasis  
**Study design:** RCT or non-RCT

**Statement E4: We suggest magnifying endoscopy with narrow band imaging for SESCO to assess the depth of invasion before endoscopic treatment (Grade of recommendation: weak, Level of evidence: low).**

**Q1.** Does magnifying endoscopy with narrow band imaging (MENBI) before endoscopic resection of superficial esophageal squamous cell carcinoma help the evaluation of the depth of invasion?

**Patient:** Patients who were diagnosed with superficial esophageal squamous cell carcinoma  
**Intervention:** MENBI  
**Comparator:** No MENBI after diagnosis of superficial esophageal squamous cell carcinoma  
**Outcome:** Depth of invasion  
**Study design:** RCT or non-RCT

**Statement E5: We recommend endoscopic submucosal dissection rather than endoscopic mucosal resection for *en bloc* and curative resection of SESCC confined to the mucosa (Grade of recommendation: strong, Level of evidence: moderate).**

**Q1.** Is endoscopic submucosal dissection more effective than endoscopic mucosal resection in patients with superficial esophageal squamous cell carcinoma in terms of *en-bloc* resection, R0 resection and curative resection?

**Patient:** Patients who undergo endoscopic resection for superficial esophageal squamous cell carcinoma

**Intervention:** Endoscopic submucosal dissection

**Comparator:** Endoscopic mucosal resection

**Outcome:** *en bloc* resection, R0 resection, curative resection

**Study design:** RCT or non-RCT

**Statement E6: We recommend oral steroid or local steroid injection therapy for patients who develop mucosal defects in >75% of the esophageal circumference after endoscopic submucosal dissection to prevent esophageal stricture (Grade of recommendation: strong, Level of evidence: moderate).**

**Q1.** Is steroid administration needed after endoscopic resection in patients with superficial esophageal squamous cell carcinoma to decrease the risk of stenosis?

**Patient:** Patients who undergo endoscopic resection for superficial esophageal squamous cell carcinoma

**Intervention:** Steroid administration after endoscopic resection (oral administration or local injection)

**Comparator:** No steroid administration after endoscopic resection

**Outcome:** Stenosis rate, number of endoscopic dilatation, adverse event

**Study design:** RCT or non-RCT

**Statement E7: No additional treatment is recommended after *en bloc* complete resection of SESCC invading no more than the lamina propria with no lymphovascular invasion because of a very low risk of lymph node metastasis (Grade of recommendation: strong, Level of evidence: moderate). As the risk of lymph node metastasis of a tumor invading into the muscularis mucosa without lymphovascular invasion is low, a close follow-up after *en bloc* complete endoscopic resection can be considered without additional treatment (Grade of recommendation: weak, Level of evidence: low). In case of a tumor with submucosal invasion, lymphovascular invasion, and/or positive vertical resection margin, additional treatment is recommended (Grade of recommendation: strong, Level of evidence: moderate).**

**Q1.** Is there a difference between observation without surgery and rescue surgery in terms of recurrence and survival in patients who achieve R0 resection by endoscopic resection for mucosal esophageal squamous cell carcinoma without lymphovascular invasion?

**Patient:** Patients who achieve R0 resection by endoscopic resection for mucosal esophageal squamous cell carcinoma without lymphovascular invasion

**Intervention:** Observation

**Comparator:** Rescue (additional) surgery

**Outcome:** Recurrence and survival rates

**Study design:** RCT or non-RCT

## 2. Description of PICO for early gastric cancer

**Statement G1: We recommend chromoendoscopy/image-enhanced endoscopy to determine the extent of lesion before endoscopic treatment of early gastric cancer (Grade of recommendation: strong, Level of evidence: moderate).**

**Q1.** Does chromoendoscopy or image-enhanced endoscopy before endoscopic resection of early gastric cancer help the evaluation of the lateral margin of the lesion?

**Patient:** Patients who were diagnosed with early gastric cancer  
**Intervention:** Chromoendoscopy, image-enhanced endoscopy  
**Comparator:** No chromoendoscopy or image-enhanced endoscopy after diagnosis of early gastric cancer  
**Outcome:** Lateral margin  
**Study design:** RCT or non-RCT

**Statement G2: Endoscopic ultrasonography before endoscopic resection of early gastric cancer may be helpful in determining the depth of invasion in some patients with early gastric cancer (Grade of recommendation: weak, Level of evidence: moderate).**

**Q1.** Does EUS before endoscopic resection of early gastric cancer help the evaluation of the depth of invasion?

**Patient:** Patients who were diagnosed with early gastric cancer  
**Intervention:** EUS  
**Comparator:** No EUS after diagnosis of early gastric cancer  
**Outcome:** Depth of invasion  
**Study design:** RCT or non-RCT

**Statement G3: We recommend endoscopic resection for early gastric cancer of well or moderately differentiated tubular or papillary adenocarcinoma meeting endoscopically estimated tumor size  $\leq 2$  cm and endoscopically suspected mucosal cancer without ulcer (Grade of recommendation: strong, Level of evidence: moderate).**

**Q1.** Can we recommend endoscopic resection for early gastric cancer of well or moderately differentiated tubular or papillary adenocarcinoma meeting endoscopically estimated tumor size  $\leq 2$  cm and endoscopically suspected mucosal cancer without ulcer?

**Patient:** Patients with early gastric cancer of well or moderately differentiated tubular or papillary adenocarcinoma meeting endoscopically estimated tumor size  $\leq 2$  cm and endoscopically suspected mucosal cancer without ulcer  
**Intervention:** Endoscopic resection  
**Comparator:** Gastrectomy with lymph node dissection  
**Outcome:** Survival rate  
**Study design:** RCT or non-RCT

**Statement G4: We suggest endoscopic resection for early gastric cancer of well or moderately differentiated tubular or papillary adenocarcinoma with the following endoscopic findings: (1) mucosal cancer  $> 2$  cm without ulcer, or (2) mucosal cancer  $\leq 3$  cm with ulcer (Grade of recommendation: weak, Level of evidence: moderate).**

**Q1.** Can we suggest endoscopic resection for early gastric cancer of well or moderately differentiated tubular or papillary adenocarcinoma with the following endoscopic findings: (1) mucosal cancer  $> 2$  cm without ulcer, or (2) mucosal cancer  $\leq 3$  cm with ulcer?

**Patient:** Patients with early gastric cancer of well or moderately differentiated tubular or papillary adenocarcinoma with the following endoscopic findings: (1) mucosal cancer  $> 2$  cm without ulcer, or (2) mucosal cancer  $\leq 3$  cm with ulcer  
**Intervention:** Endoscopic resection  
**Comparator:** Gastrectomy with lymph node dissection  
**Outcome:** Survival rate  
**Study design:** RCT or non-RCT

**Statement G5: We suggest endoscopic resection for poorly differentiated tubular adenocarcinoma, poorly cohesive carcinoma, or signet ring cell carcinoma meeting the following endoscopic findings: endoscopically estimated tumor size  $\leq 2$  cm, endoscopically mucosal cancer, and no ulcer in the tumor (Grade of recommendation: weak, Level of evidence: low).**

**Q1.** Can we suggest endoscopic resection for poorly differentiated tubular adenocarcinoma, poorly cohesive carcinoma, or signet ring cell carcinoma meeting the following endoscopic findings: endoscopically estimated tumor size  $\leq 2$  cm, endoscopically mucosal cancer, and no ulcer in the tumor?

**Patient:** Patients with early gastric cancer of poorly differentiated tubular adenocarcinoma, poorly cohesive carcinoma, or signet ring cell carcinoma meeting the following endoscopic findings: endoscopically estimated tumor size  $\leq 2$  cm, endoscopically mucosal cancer, and no ulcer in the tumor

**Intervention:** Endoscopic resection

**Comparator:** Gastrectomy with lymph node dissection

**Outcome:** Survival rate

**Study design:** RCT or non-RCT

**Statement G6: We recommend prophylactic hemostasis of visible vessels on the post-resection ulcer caused by endoscopic resection of early gastric cancer to lower the risk of delayed bleeding (Grade of recommendation: strong, Level of evidence: low).**

**Q1.** Can prophylactic hemostasis of visible vessels on the post-resection ulcer caused by endoscopic resection of early gastric cancer reduce the risk of delayed bleeding?

**Patient:** Patients who underwent endoscopic resection for early gastric cancer

**Intervention:** Prophylactic hemostasis of visible vessels on the post-resection ulcer

**Comparator:** No prophylactic hemostasis

**Outcome:** Delayed bleeding

**Study design:** RCT or non-RCT

**Statement G7: We recommend proton pump inhibitors to decrease the risk of symptoms and complications associated with iatrogenic ulcers caused by endoscopic resection of early gastric cancer (Grade of recommendation: strong, Level of evidence: high).**

**Q1.** Can proton pump inhibitors decrease the risk of symptoms and complications associated with iatrogenic ulcers caused by endoscopic resection of early gastric cancer?

**Patient:** Patients who underwent endoscopic resection for early gastric cancer

**Intervention:** Use of proton pump inhibitors

**Comparator:** No use of proton pump inhibitors

**Outcome:** Symptoms and complications associated with iatrogenic ulcers

**Study design:** RCT or non-RCT

**Statement G8: We recommend endoscopic closure as the first treatment option for perforation that occurred during endoscopic resection of early gastric cancer (Grade of recommendation: strong, Level of evidence: low).**

**Q1.** What is the first treatment option for perforation that occurred during endoscopic resection of early gastric cancer?

**Patient:** Patients with perforation that occurred during endoscopic resection

**Intervention:** Endoscopic closure

**Comparator:** Surgery or conservative management

**Outcome:** Closure rate

**Study design:** RCT or non-RCT

**Statement G9: We recommend surgical gastrectomy if histopathological evaluation after endoscopic resection of early gastric cancer meets the criteria for non-curative resection. An exception applies if cancer invasion is observed at the horizontal resection margin only (Grade of recommendation: strong, Level of evidence: moderate).**

**Q1.** Is there a difference between observation without surgery and rescue surgery in terms of recurrence and survival in patients with early gastric cancer meeting the criteria for non-curative resection (an exception applies if cancer invasion is observed at the horizontal resection margin only)?

**Patient:** Patients with early gastric cancer meeting the criteria for non-curative resection (an exception applies if cancer invasion is observed at the horizontal resection margin only)

**Intervention:** Rescue surgery

**Comparator:** Observation without surgery

**Outcome:** Recurrence and survival

**Study design:** RCT or non-RCT

**Statement G10: We recommend additional endoscopic management rather than surgical gastrectomy if histopathological evaluation of endoscopically resected early gastric cancer specimen shows positive involvement at the horizontal resection margin without any other findings compatible with non-curative resection (Grade of recommendation: strong, Level of evidence: moderate).**

**Q1.** Is there a difference between additional endoscopic therapy without surgery and rescue surgery in terms of recurrence and survival in patients with early gastric cancer with positive involvement at the horizontal resection margin without any other findings compatible with non-curative resection?

**Patient:** Patients with early gastric cancer with positive involvement at the horizontal resection margin without any other findings compatible with non-curative resection

**Intervention:** Additional endoscopic therapy

**Comparator:** Rescue surgery

**Outcome:** Recurrence and survival

**Study design:** RCT or non-RCT

**Statement G11: We recommend *Helicobacter pylori* eradication treatment after endoscopic resection of early gastric cancer in *H. pylori*-infected patients (Grade of recommendation: strong, Level of evidence: high).**

**Q1.** Can *H. pylori* eradication treatment after endoscopic resection of early gastric cancer reduce the metachronous gastric cancer in *H. pylori*-infected patients?

**Patient:** *H. pylori*-infected patients after endoscopic resection of early gastric cancer

**Intervention:** *H. pylori* eradication treatment

**Comparator:** No eradication

**Outcome:** Incidence of the metachronous gastric cancer

**Study design:** RCT or non-RCT

**Statement G12: We recommend regular surveillance endoscopy every 6–12 month for patients who have had curative endoscopic resection of early gastric cancer based on absolute or expanded criteria for early detection of metachronous gastric cancer (Grade of recommendation: strong, Level of evidence: low).**

**Q1.** Does regular surveillance endoscopy every 6–12 month help the early detection of metachronous gastric cancer in patients who have had curative endoscopic resection of early gastric cancer based on absolute or expanded criteria?

**Patient:** Patients who have had curative endoscopic resection of early gastric cancer based on absolute or expanded criteria

**Intervention:** Surveillance endoscopy every 6–12 month

**Comparator:** No surveillance endoscopy

**Outcome:** Early detection of metachronous gastric cancer

**Study design:** RCT or non-RCT

**Statement G13: We suggest regular abdominopelvic computed tomography scan of 6–12 month interval for detection of extra-gastric recurrence after curative endoscopic resection of early gastric cancer based on absolute and expanded criteria (Grade of recommendation: weak, Level of evidence: low).**

**Q1.** Does regular abdominopelvic computed tomography scan every 6–12 month help the detection of extra-gastric recurrence in patients who have had curative endoscopic resection of early gastric cancer based on absolute or expanded criteria?

**Patient:** Patients who have had curative endoscopic resection of early gastric cancer based on absolute or expanded criteria  
**Intervention:** Abdominopelvic computed tomography scan every 6–12 month  
**Comparator:** No surveillance computed tomography scan  
**Outcome:** Detection of extra-gastric recurrence  
**Study design:** RCT or non-RCT

### 3. Description of PICOs for early colorectal cancer

**Statement C1: Poor histologic types (poorly differentiated adenocarcinoma, signet ring cell carcinoma, and mucinous carcinoma), deep submucosal invasion, lymphovascular invasion, and intermediate-to-high-grade tumor budding at the site of deepest invasion are risk factors of lymph node metastasis in early colorectal cancer (Grade of recommendation: strong, Level of evidence: moderate).**

**Q1.** Does intramucosal colorectal cancer have the risk of lymph node metastasis?

**Patient:** Patients who were diagnosed with intramucosal colorectal cancer  
**Intervention:** Not applicable  
**Comparator:** Not applicable  
**Outcome:** Incidence of lymph node metastasis  
**Study design:** RCT or non-RCT

**Q2.** Is the risk of lymph node metastasis higher in the deep submucosal invasive colorectal cancer than in the superficial submucosal invasive colorectal cancer?

**Patient:** Patients who were diagnosed with submucosal colorectal cancer  
**Intervention:** Patients who were diagnosed with deep submucosal colorectal cancer  
**Comparator:** Patients who were diagnosed with superficial submucosal colorectal cancer  
**Outcome:** Incidence of lymph node metastasis  
**Study design:** RCT or non-RCT

**Q3.** Is the risk of lymph node metastasis higher in the submucosal invasive colorectal cancer with lymphovascular invasion than in the submucosal invasive colorectal cancer without lymphovascular invasion?

**Patient:** Patients who were diagnosed with submucosal colorectal cancer  
**Intervention:** Patients who were diagnosed with submucosal colorectal cancer with lymphovascular invasion  
**Comparator:** Patients who were diagnosed with submucosal colorectal cancer without lymphovascular invasion  
**Outcome:** Incidence of lymph node metastasis  
**Study design:** RCT or non-RCT

**Q4.** Is the risk of lymph node metastasis higher in the submucosal invasive colorectal cancer with tumor budding than in the submucosal invasive colorectal cancer without tumor budding?

**Patient:** Patients who were diagnosed with submucosal colorectal cancer  
**Intervention:** Patients who were diagnosed with submucosal colorectal cancer with tumor budding  
**Comparator:** Patients who were diagnosed with submucosal colorectal cancer without tumor budding  
**Outcome:** Incidence of lymph node metastasis  
**Study design:** RCT or non-RCT

**Q5.** Is the risk of lymph node metastasis higher in the poorly differentiated early colorectal cancer than in the well or moderately differentiated early colorectal cancer?

**Patient:** Patients who were diagnosed with early colorectal cancer  
**Intervention:** Patients who were diagnosed with poorly differentiated early colorectal cancer  
**Comparator:** Patients who were diagnosed with well or moderately differentiated early colorectal cancer  
**Outcome:** Incidence of lymph node metastasis  
**Study design:** RCT or non-RCT

**Statement C2: Endoscopic resection of submucosal colorectal cancer with a high risk of lymph node metastasis has a higher recurrence rate than surgical resection. Therefore, we recommend additional surgery if histological signs after endoscopic resection suggest a high risk of lymph node metastasis (Grade of recommendation: strong, Level of evidence: high).**

**Q1.** Are the recurrence and survival rates different between the endoscopic resection and the surgical resection for the submucosal invasive colorectal cancer with low risk of lymph node metastasis?

**Patient:** Patients who were diagnosed with submucosal colorectal cancer with low risk of lymph node metastasis  
**Intervention:** Endoscopic resection  
**Comparator:** Surgery  
**Outcome:** Recurrence and/or survival rates  
**Study design:** RCT or non-RCT

**Q2.** Are the recurrence and survival rates different between the endoscopic resection and the surgical resection for the submucosal invasive colorectal cancer with high risk of lymph node metastasis?

**Patient:** Patients who were diagnosed with submucosal colorectal cancer with high risk of lymph node metastasis  
**Intervention:** Endoscopic resection  
**Comparator:** Surgery  
**Outcome:** Recurrence and/or survival rates  
**Study design:** RCT or non-RCT

**Statement C3: We recommend endoscopic assessment of pit patterns and vascular patterns to estimate the depth of submucosal invasion before endoscopic resection of early colorectal cancer (Grade of recommendation: strong, Level of evidence: high).**

**Q1.** For the diagnosis of suspected/established early colorectal cancer, is narrow band imaging useful to differentiate mucosal/superficial submucosal cancer from deep submucosal cancer compared with white light endoscopy?

**Patient:** Patients who have suspected or established early colorectal cancer  
**Intervention:** Narrow band imaging  
**Comparator:** White light endoscopy  
**Outcome:** Differentiation of mucosal/superficial submucosal cancer from deep submucosal cancer (diagnostic accuracy)  
**Study design:** RCT or non-RCT

**Q2.** For the diagnosis of suspected/established early colorectal cancer, is chromoendoscopy useful to differentiate mucosal/superficial submucosal cancer from deep submucosal cancer compared with white light endoscopy?

**Patient:** Patients who have suspected or established early colorectal cancer  
**Intervention:** Chromoendoscopy  
**Comparator:** White light endoscopy  
**Outcome:** Differentiation of mucosal/superficial submucosal cancer from deep submucosal cancer (diagnostic accuracy)  
**Study design:** RCT or non-RCT



**Q3.** For the diagnosis of suspected/established early colorectal cancer, is magnifying endoscopy useful to differentiate mucosal/superficial submucosal cancer from deep submucosal cancer compared with conventional endoscopy?

**Patient:** Patients who have suspected or established early colorectal cancer

**Intervention:** Magnifying endoscopy

**Comparator:** Conventional (non-magnifying) endoscopy

**Outcome:** Differentiation of mucosal/superficial submucosal cancer from deep submucosal cancer (diagnostic accuracy)

**Study design:** RCT or non-RCT

**Statement C4. *En bloc* and histologically complete resection should be achieved for endoscopic treatment of a suspected or established early colorectal cancer. We recommend endoscopic submucosal dissection for the treatment of endoscopically resectable early colorectal cancer which cannot be resected *en bloc* using endoscopic mucosal resection technique (Grade of recommendation: strong, Level of evidence: moderate).**

**Q1.** Does endoscopic submucosal dissection provide higher *en bloc* resection rate for suspected or established early colorectal cancer than endoscopic mucosal resection or other endoscopic resection techniques?

**Patient:** Patients who have suspected or established early colorectal cancer

**Intervention:** Endoscopic submucosal dissection

**Comparator:** Endoscopic mucosal resection, endoscopic resection techniques other than endoscopic submucosal dissection

**Outcome:** *En bloc* resection rate

**Study design:** RCT or non-RCT
